# Supplementary material for: Elemental mapping of structural materials for a nuclear reactor by means of LA-ICP-MS
Source: Royal Society of Chemistry journal article supplement (doi:10.1039/c2ja30037k), 2012-01-01
Supplement: c2ja30037k.pdf [file c2ja30037k.pdf]

## Supporting Information

### Elemental mapping of structural materials for nuclear reactor by means of LA-ICP-MS

**T. Vaculovič**<sup>1,2</sup>, **T. Warchilová**<sup>1,2</sup>, **T. Šimo**<sup>3</sup>, **O. Matal**<sup>3</sup>, **V. Otruba**<sup>1</sup>, **P. Mikuška**<sup>4</sup>, **V. Kanický**<sup>1,2</sup>

<sup>1</sup>Laboratory of Atomic Spectrochemistry, Department of Chemistry, Faculty of Science, Masaryk University, 611 37 Brno, Czech Republic

<sup>2</sup>Central European Institute of Technology, Kamenice 5, Brno, 62500, Czech Republic

<sup>3</sup>ENERGOVÝZKUM, spol. r. o., 61200 Brno, Czech Republic

<sup>4</sup>Institute of Analytical Chemistry of the Academy of Sciences of the Czech Republic, v.v.i., 602 00 Brno, Czech Republic

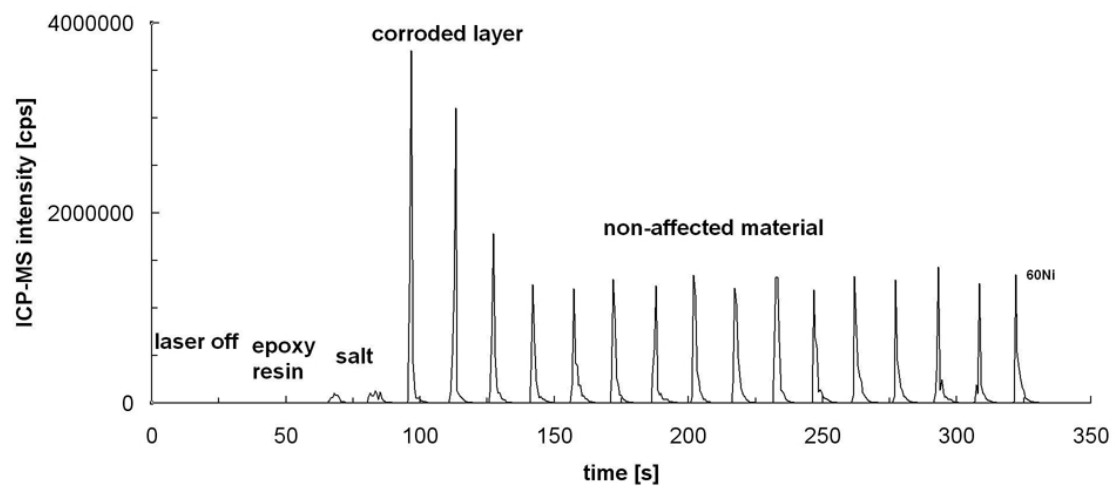

Caption : Fig. S1: LA-ICP-MS time profile of nickel ICP-MS signal obtained by laser ablation of pure nickel

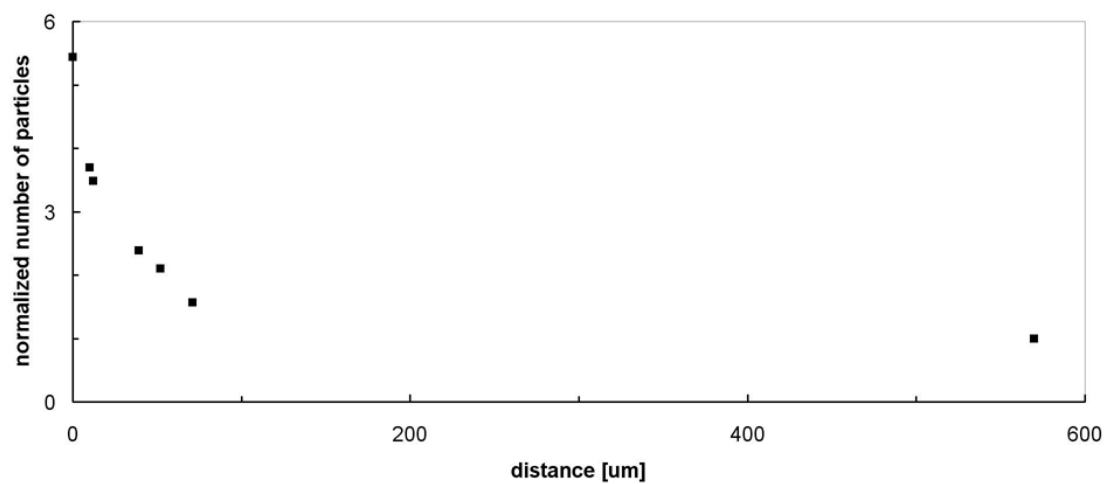

Caption : Fig. S2: Dependence of the aerosol density on the distance from the edge of the corrosion-affected zone towards the unaffected area (sample A071EV)

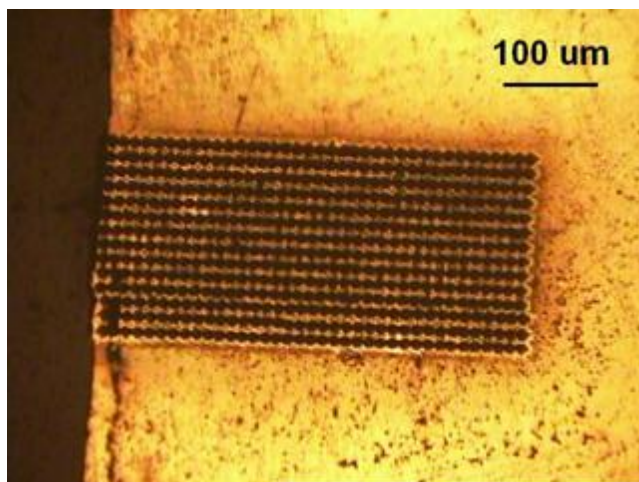

Caption : Fig. S3: The grid consisting of lines of isolated ablation craters produced on the section of the test specimen made of pure nickel.
